# Supplementary material
Source: PubMed Central journal article supplement (PMC4604058)
Supplement: NIHMS719620-supplement-supplement_1.pdf [file NIHMS719620-supplement-supplement_1.pdf]

Supplementary Table 1. Algorithm used to determine whether child had received age-appropriate number of pneumococcal conjugate vaccine (PCV) doses at time of submitting nasopharyngeal swab<sup>a</sup>

| If child age at time of culture date (months): | Then age-appropriately vaccinated if received:                                                                                                                                                                                                                                                  |
|------------------------------------------------|-------------------------------------------------------------------------------------------------------------------------------------------------------------------------------------------------------------------------------------------------------------------------------------------------|
| 3                                              | 1 PCV dose                                                                                                                                                                                                                                                                                      |
| 4                                              | $\geq 1$ PCV doses                                                                                                                                                                                                                                                                              |
| 5                                              | 2 PCV doses                                                                                                                                                                                                                                                                                     |
| 6                                              | $\geq 2$ PCV doses                                                                                                                                                                                                                                                                              |
| 7–12                                           | 3 PCV doses                                                                                                                                                                                                                                                                                     |
| 12–15                                          | $\geq 3$ PCV doses, if first dose at age $\leq 6$ months<br>$\geq 2$ PCV doses, if first dose at age 7–12 months<br>$\geq 1$ PCV doses, if first dose at age $\geq 12$ months                                                                                                                   |
| 16–23                                          | 4 PCV doses, if first dose at age $\leq 6$ months and 1 dose was received at $\geq 12$ months<br>$\geq 3$ PCV doses, if first dose at age 7–12 months and 1 dose was received at $\geq 12$ months<br>$\geq 2$ doses PCV doses at $\geq 1$ year of age                                           |
| $\geq 24$                                      | 4 PCV doses, if first dose at age $\leq 6$ months and 1 dose was received at $\geq 12$ months<br>$\geq 3$ PCV doses, if first dose at age 7–11 months and 1 dose was received at $\geq 12$ months<br>$\geq 2$ PCV doses at $\geq 1$ years of age<br>$\geq 1$ PCV doses at $\geq 2$ years of age |

<sup>a</sup> Based on the Advisory Committee on Immunization Practices recommendations.
